# Supplementary material
Source: PubMed Central journal article supplement (PMC8387128)
Supplement: 10-1055-s-0041-1733909-s210118r.pdf [file 10-1055-s-0041-1733909-s210118r.pdf]

## Supplementary Material Search strategies

### Ovid MEDLINE(R) and Epub Ahead of Print, In-Process and Other Nonindexed Citations and Daily

Search history sorted by search number ascending

| No. | Searches                                                                                                                                                                                                                                                                                                                                                                                                                                                                                                                                                                                                                                                                                                                         | Results   | Type     |
|-----|----------------------------------------------------------------------------------------------------------------------------------------------------------------------------------------------------------------------------------------------------------------------------------------------------------------------------------------------------------------------------------------------------------------------------------------------------------------------------------------------------------------------------------------------------------------------------------------------------------------------------------------------------------------------------------------------------------------------------------|-----------|----------|
| 1   | exp *Medical Records Systems, Computerized/                                                                                                                                                                                                                                                                                                                                                                                                                                                                                                                                                                                                                                                                                      | 24,961    | Advanced |
| 2   | (emr or ehr or ((paperless or automated or computer* or electronic) adj3 (health or medical or record*)) or cpoe).ti,ab,kw.                                                                                                                                                                                                                                                                                                                                                                                                                                                                                                                                                                                                      | 47,299    | Advanced |
| 3   | 1 or 2                                                                                                                                                                                                                                                                                                                                                                                                                                                                                                                                                                                                                                                                                                                           | 59,733    | Advanced |
| 4   | 3 and (documentation* or order* or discharg* or summar* or charting).mp.                                                                                                                                                                                                                                                                                                                                                                                                                                                                                                                                                                                                                                                         | 13,114    | Advanced |
| 5   | 4 and ((workflow or workload).mp. or "task performance and analysis"/ or "time and motion studies"/ or (work adj2 (flow* or load* or sampl* or redesign*))).mp. or video*.mp.) [mp = title, abstract, original title, name of substance word, subject heading word, floating sub-heading word, keyword heading word, protocol supplementary concept word, rare disease supplementary concept word, unique identifier, synonyms]                                                                                                                                                                                                                                                                                                  | 1,217     | Advanced |
| 6   | 4 and (efficiency, organizational/ or efficien*.mp. or inefficient*.mp. or time management/) [mp = title, abstract, original title, name of substance word, subject heading word, floating sub-heading word, keyword heading word, protocol supplementary concept word, rare disease supplementary concept word, unique identifier, synonyms]                                                                                                                                                                                                                                                                                                                                                                                    | 1,556     | Advanced |
| 7   | (4 and (data adj2 entry adj3 (error*1 or inaccurac* or inaccurate* or mistake*1 or omission* or omit*).tw.) or (mouse adj3 (click* or move* or mile*1)).tw.                                                                                                                                                                                                                                                                                                                                                                                                                                                                                                                                                                      | 735       | Advanced |
| 8   | 5 or 6 or 7                                                                                                                                                                                                                                                                                                                                                                                                                                                                                                                                                                                                                                                                                                                      | 3,172     | Advanced |
| 9   | limit 8 to (english language and yr = "1990 -Current")                                                                                                                                                                                                                                                                                                                                                                                                                                                                                                                                                                                                                                                                           | 2,981     | Advanced |
| 10  | exp education, medical/ or exp specialties, medical/ or exp specialties, surgical/ or "internship and residency"/ or students, medical/ or exp physicians/ or physician*.mp. or internist*.mp. or doctor*.mp. or resident*.mp. or gp.mp. or practitioner*.mp. or hospitalist*.mp. or surgeon*.mp. or osteopath*.mp. or icu. mp. or picu.mp. or micu.mp. or sicu.mp. or nicu.mp. or (intensive adj2 (unit* or ward*))).mp. or (operating adj2 (suite or room* or theater*))).mp. [mp = title, abstract, original title, name of substance word, subject heading word, floating sub-heading word, keyword heading word, protocol supplementary concept word, rare disease supplementary concept word, unique identifier, synonyms] | 2,138,624 | Advanced |
| 11  | 9 and 10                                                                                                                                                                                                                                                                                                                                                                                                                                                                                                                                                                                                                                                                                                                         | 1,244     |          |

**Embase <1988 to 2018 Week 49>**

Search history sorted by search number ascending

| No. | Searches                                                                                                                                                                                                                                                                                                                                                                                                                                                                                                                                                                                                                                                                                | Results   | Type     |
|-----|-----------------------------------------------------------------------------------------------------------------------------------------------------------------------------------------------------------------------------------------------------------------------------------------------------------------------------------------------------------------------------------------------------------------------------------------------------------------------------------------------------------------------------------------------------------------------------------------------------------------------------------------------------------------------------------------|-----------|----------|
| 1   | exp *Medical Records Systems, Computerized/ or exp *electronic health record/ or exp *medical information system/                                                                                                                                                                                                                                                                                                                                                                                                                                                                                                                                                                       | 10,398    | Advanced |
| 2   | (emr or ehr or ((paperless or automated or computer* or electronic) adj3 (health or medical or record*)) or cpoe).ti,ab,kw.                                                                                                                                                                                                                                                                                                                                                                                                                                                                                                                                                             | 81,343    | Advanced |
| 3   | 1 or 2                                                                                                                                                                                                                                                                                                                                                                                                                                                                                                                                                                                                                                                                                  | 88,336    | Advanced |
| 4   | 3 and (documentation* or order* or discharg* or summar* or charting).mp.                                                                                                                                                                                                                                                                                                                                                                                                                                                                                                                                                                                                                | 22,073    | Advanced |
| 5   | 4 and ((workflow or workload).mp. or "task performance and analysis"/ or "time and motion studies"/ or (work adj2 (flow* or load* or sampl* or redesign*)).mp. or video*.mp.) [mp = title, abstract, heading word, drug trade name, original title, device manufacturer, drug manufacturer, device trade name, keyword, floating subheading word, candidate term word]                                                                                                                                                                                                                                                                                                                  | 1,876     | Advanced |
| 6   | 4 and (efficiency, organizational/ or efficien*.mp. or inefficient*.mp. or time management/) [mp = title, abstract, heading word, drug trade name, original title, device manufacturer, drug manufacturer, device trade name, keyword, floating subheading word, candidate term word]                                                                                                                                                                                                                                                                                                                                                                                                   | 3,038     | Advanced |
| 7   | (4 and (data adj2 entry adj3 (error*1 or inaccurac* or inaccurate* or mistake*1 or omission* or omit*).tw.) or (mouse adj3 (click* or move* or mile*1)).tw.                                                                                                                                                                                                                                                                                                                                                                                                                                                                                                                             | 946       | Advanced |
| 8   | 5 or 6 or 7                                                                                                                                                                                                                                                                                                                                                                                                                                                                                                                                                                                                                                                                             | 5,277     | Advanced |
| 9   | limit 8 to (english language and yr = "1990 -Current")                                                                                                                                                                                                                                                                                                                                                                                                                                                                                                                                                                                                                                  | 5,087     | Advanced |
| 10  | exp education, medical/ or exp specialties, medical/ or exp specialties, surgical/ or "internship and residency"/ or students, medical/ or exp physicians/ or clinician*.mp. or physician*.mp. or internist*.mp. or doctor*.mp. or resident*.mp. or gp.mp. or practitioner*.mp. or hospitalist*.mp. or surgeon*.mp. or osteopath*.mp. or icu.mp. or picu.mp. or micu.mp. or sicu.mp. or nicu.mp. or (intensive adj2 (unit* or ward*)).mp. or (operating adj2 (suite or room* or theater*)).mp. [mp = title, abstract, heading word, drug trade name, original title, device manufacturer, drug manufacturer, device trade name, keyword, floating subheading word, candidate term word] | 7,306,445 | Advanced |
| 11  | 9 and 10                                                                                                                                                                                                                                                                                                                                                                                                                                                                                                                                                                                                                                                                                | 3,029     | Advanced |
| 12  | remove duplicates from 11                                                                                                                                                                                                                                                                                                                                                                                                                                                                                                                                                                                                                                                               | 2,990     | Advanced |
| 13  | 12 not case report/                                                                                                                                                                                                                                                                                                                                                                                                                                                                                                                                                                                                                                                                     | 2,948     |          |

## Cumulative Index to Nursing and Allied Health Literature

|     |                                                           |                                                                |                                                                                                        |        |
|-----|-----------------------------------------------------------|----------------------------------------------------------------|--------------------------------------------------------------------------------------------------------|--------|
| S18 | S14 or S16                                                | Narrow by language: - English<br>Search Modes - Boolean/Phrase | Interface - EBSCOhost research databases search screen - basic search database - CINAHL with full text | 334    |
| S17 | S14 or S16                                                | Search modes - Boolean/Phrase                                  | Interface - EBSCOhost research databases search screen - basic search database - CINAHL with full text | 644    |
| S16 | S13 and S15                                               | Search modes - Boolean/Phrase                                  | Interface - EBSCOhost research databases search screen - basic search database - CINAHL with full text | 320    |
| S15 | (MH "productivity") OR (MH "workload") OR (MH "workflow") | Search modes - Boolean/Phrase                                  | Interface - EBSCOhost research databases search screen - basic search database - CINAHL with full text | 22,120 |
| S14 | S12 and S13                                               | Search modes - Boolean/Phrase                                  | Interface - EBSCOhost research databases search screen - basic search database - CINAHL with full text | 364    |
| S13 | S3 or S7                                                  | Search modes - Boolean/Phrase                                  | Interface - EBSCOhost research databases search screen - basic search database - CINAHL with full text | 12,335 |

(Continued)

(Continued)

|     |                                                                                                          |                               |                                                                                                        |         |
|-----|----------------------------------------------------------------------------------------------------------|-------------------------------|--------------------------------------------------------------------------------------------------------|---------|
| S12 | S10 or S11                                                                                               | Search modes - Boolean/Phrase | Interface - EBSCOhost research databases search screen - basic search database - CINAHL with full text | 146,306 |
| S11 | (MH "time management")                                                                                   | Search modes - Boolean/Phrase | Interface - EBSCOhost research databases search screen - basic search database - CINAHL with full text | 3,138   |
| S10 | (MH "time and motion studies + ") OR (MH "time factors")                                                 | Search modes - Boolean/Phrase | Interface - EBSCOhost research databases search screen - basic search database - CINAHL with full text | 143,329 |
| S9  | S3 and S8                                                                                                | Search modes - Boolean/Phrase | Interface - EBSCOhost research databases search screen - basic search database - CINAHL with full text | 1,444   |
| S8  | Time or hours or day                                                                                     | Search modes - Boolean/Phrase | Interface - EBSCOhost research databases search screen - basic search database - CINAHL with full text | 796,707 |
| S7  | S1 and S6                                                                                                | Search modes - Boolean/Phrase | Interface - EBSCOhost research databases search screen - basic search database - CINAHL with full text | 602     |
| S6  | (MH "Charting + ") OR (MH "record review")                                                               | Search modes - Boolean/Phrase | Interface - EBSCOhost research databases search screen - basic search database - CINAHL with full text | 56,474  |
| S5  | S1 and S4                                                                                                | Search modes - Boolean/Phrase | Interface - EBSCOhost research databases search screen - basic search database - CINAHL with full text | 377     |
| S4  | Charting                                                                                                 | Search modes - Boolean/Phrase | Interface - EBSCOhost research databases search screen - basic search database - CINAHL with full text | 3,795   |
| S3  | S1 and S2                                                                                                | Search modes - Boolean/Phrase | Interface - EBSCOhost research databases search screen - basic search database - CINAHL with full text | 12,335  |
| S2  | (MH "documentation + ") OR (MH "clinical documentation improvement") OR (MH "documentation (Iowa NIC)")  | Search modes - Boolean/Phrase | Interface - EBSCOhost research databases search screen - basic search database - CINAHL with full text | 161,211 |
| S1  | (MM "patient record systems") OR (MM "electronic health records") OR (MM "clinical information systems") | Search modes - Boolean/Phrase | Interface - EBSCOhost research databases search screen - basic search database - CINAHL with full text | 18,546  |

| Scopus                                                                                                                                                                                                                                                                                                                                                                                           |
|--------------------------------------------------------------------------------------------------------------------------------------------------------------------------------------------------------------------------------------------------------------------------------------------------------------------------------------------------------------------------------------------------|
| ((TITLE-ABS KEY (((electronic OR computer* OR paperless OR automated) W/2 (health OR medical OR patient* OR record)) OR emr OR emrs OR ehr OR hrs OR "order entry" OR cpoe) AND TITLE-ABS-KEY ((documentation OR charting))) AND PUBYEAR > 1989) AND (workflow OR workload OR time OR productivity) AND NOT (INDEX (medline)) AND NOT (INDEX (embase)) AND (LIMIT-TO (LANGUAGE, "English"))) 392 |
